# Supplementary material for: ZIF-67 Derived Co2VO4 Hollow Nanocubes for High Performance Asymmetric Supercapacitors
Source: MDPI journal article supplement (doi:10.3390/nano12050848), 2022-03-02
Supplement: s1 [file s1]

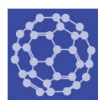

Supporting Information

# ZIF-67 Derived $\text{Co}_2\text{VO}_4$ Hollow Nanocubes for High Performance Asymmetric Supercapacitors

Chengda Li <sup>1,2</sup>, Dongliang Ma <sup>1,2,\*</sup> and Qinglin Zhu <sup>1,2</sup>

<sup>1</sup> Xinjiang Key Laboratory of Solid State Physics and Devices, Xinjiang University, Urumqi 830017, China; lichengda572@163.com (C.L.); linzyzn1@163.com (Q.Z.)

<sup>2</sup> School of Physical Science and Technology, Xinjiang University, Urumqi 830017, China

\* Correspondence: dlma@xju.edu.cn

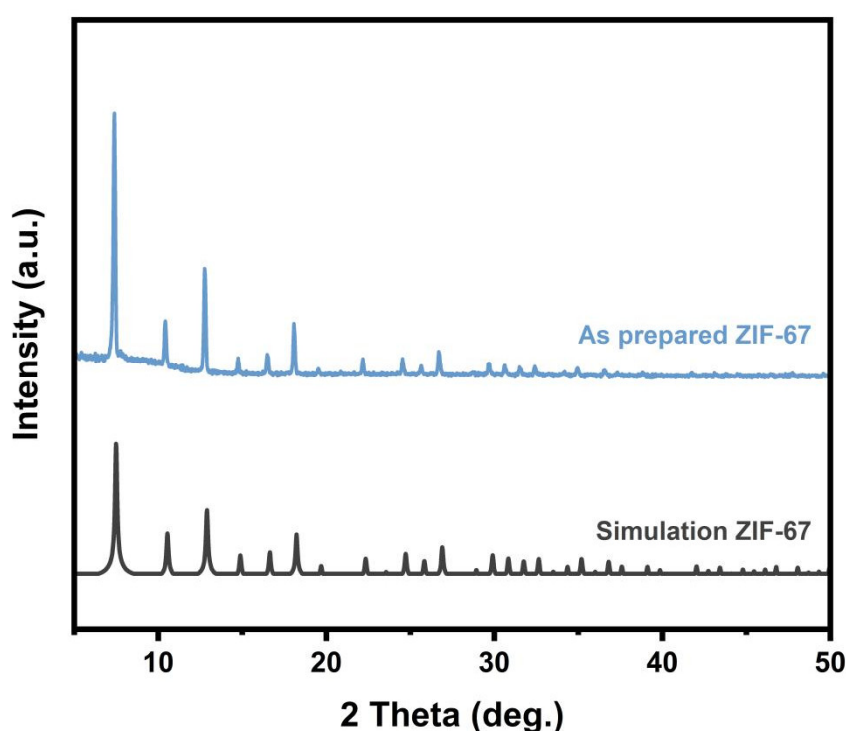

Figure S1. XRD pattern of ZIF-67.

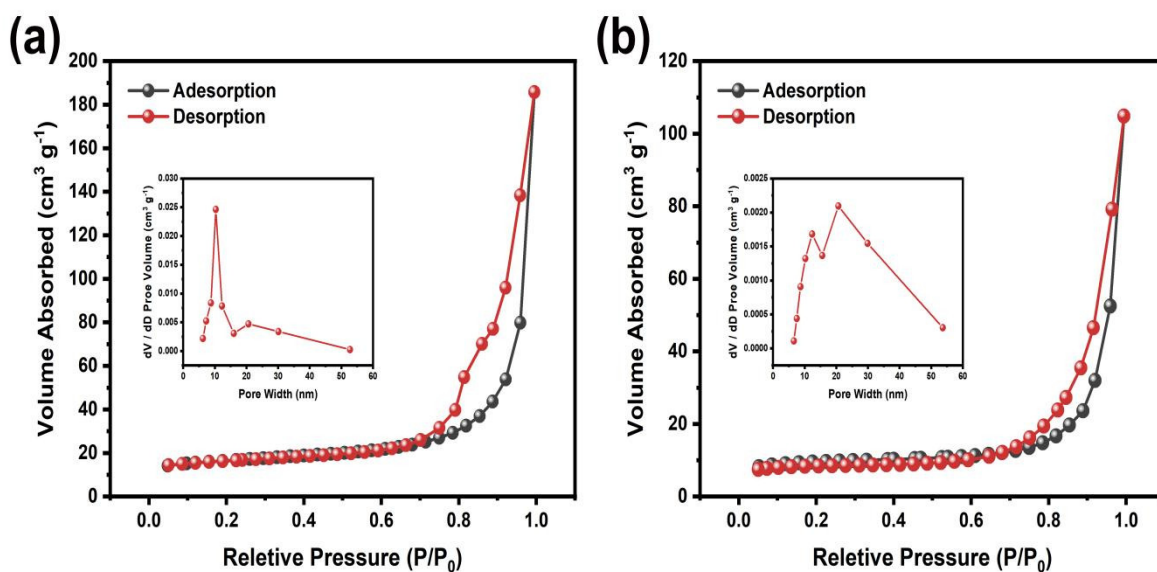

Figure S2. Nitrogen absorption/desorption isothermal and pore size distribution curves of (a) CoVO-HNC, (b) CoVO-NP.

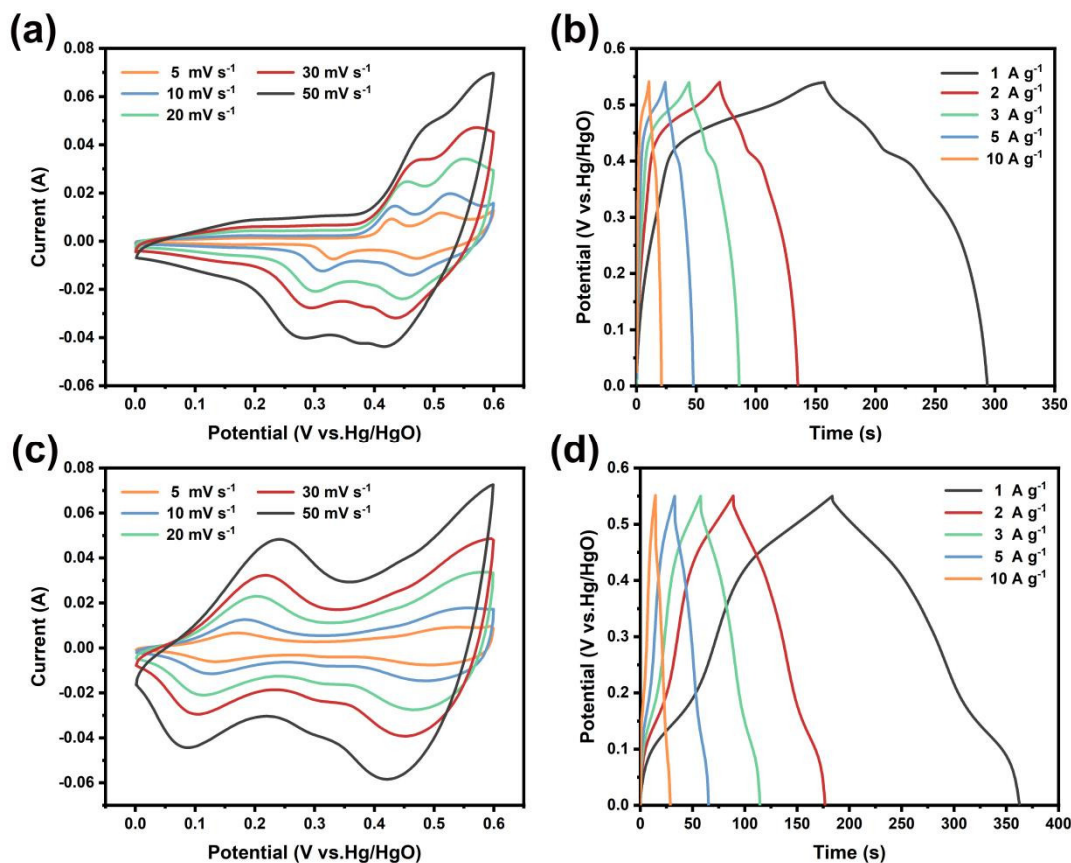

Figure S3. (a) CV curves of CoO-HNC at scan rates of 5–50  $\text{mV s}^{-1}$ ; (b) GCD curves of CoO-HNC at current densities of 1–10  $\text{A g}^{-1}$ ; (c) CV curves of CoVO-NP at scan rates of 5–50  $\text{mV s}^{-1}$ ; (d) GCD curves of CoVO-NP at current densities of 1–10  $\text{A g}^{-1}$ .

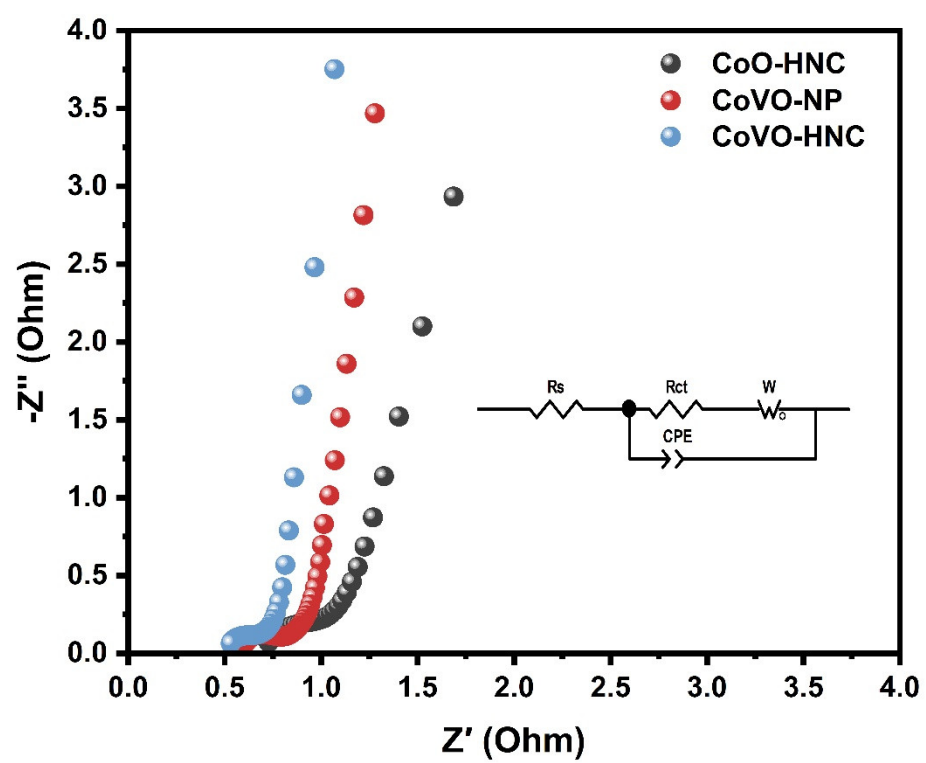

Figure S4. Nyquist plots of CoO-HNC, CoVO-HNC and CoVO-NP .
